# Supplementary material for: Circular RNAs expression profiles in human gastric cancer
Source: PubMed Central journal article supplement (PMC5567231; doi:10.1038/s41598-017-09076-6), 2017-08-22
Supplement: 41598_2017_9076_MOESM1_ESM.pdf [file 41598_2017_9076_MOESM1_ESM.pdf]

## **Circular RNAs expression profiles in human gastric cancer**

Yuan Dang, Xiaojuan Ouyang, Fan Zhang, Kai Wang, Youdong Lin, Baochang Sun,  
Yu Wang, Lie Wang, Qiaojia Huang

**Table S1. Primers used for qRT-PCR verification of the 7 random selected circRNAs**

| <b>circRNA Name</b> | <b>Forward primer (5'-&gt;3')</b> | <b>Reverse primer(5'-&gt;3')</b> |
|---------------------|-----------------------------------|----------------------------------|
| hsa_circ_0081146    | TGGCAGCCAGGGGGAAC                 | TCCAGAAGGACCTCGGCTTC             |
| hsa_circ_0084720    | AGGACTCAGCCCCACAGTTT              | TGTCTCCGTCTCCTGATTTCTG           |
| hsa_circ_0054971    | GGCTCCGAAGGAGAAGACCT              | ACGGAAAGCTGCAACCACAA             |
| hsa_circ_0057104    | TGGATTGCCCATATCACGTCT             | GGCTGTCCTGGTGATTTTGCT            |
| hsa_circ_0058766    | AGCATCGACTCCGATGTGTG              | GAGGCCAGTGTGGTCCACTT             |
| hsa_circ_0060108    | GATGCCCAAGGGACCTCAAG              | AAAGGGGAGGGTCTGCGAAT             |
| hsa_circ_0063561    | GAGACCGACTACCTGACGGG              | GGCCGGTTCAGTCCCTTTG              |
| GAPDH               | AGCCACATCGCTCAGACAC               | GCCAATACGACCAAATCC               |
